# Supplementary material for: β-Amylase production from packaging-industry wastewater using a novel strain Paenibacillus chitinolyticus CKS 1
Source: Royal Society of Chemistry journal article supplement (doi:10.1039/c5ra11964b), 2015-01-01
Supplement: c5ra11964b1.pdf [file c5ra11964b1.pdf]

Supplementary file

Table 1. Physico-chemical characteristics of waste water from the factory of transport packaging

| Parameters         | Units               | Minimum extent permitted discharge into the sewer | Minimum values | Maximum values | Mean values |
|--------------------|---------------------|---------------------------------------------------|----------------|----------------|-------------|
| pH value           |                     | 6.5-9.5                                           | 7              | 8.2            | 7.6         |
| Suspended solids   | mg/L                | 150                                               | 850            | 1250           | 1050        |
| COD                | mgO <sub>2</sub> /l | 1000                                              | 900            | 1150           | 1025        |
| BOD <sub>5</sub>   | mgO <sub>2</sub> /l | 500                                               | 720            | 780            | 750         |
| Chlorides          | mg/L                |                                                   | 45             | 70             | 57.5        |
| Sulphates          | mg/L                | 400                                               | 46             | 90             | 68          |
| Anionic detergents | mg/L                |                                                   | 3.2            | 3.8            | 3.5         |
| Nitrate            | mg/L                |                                                   | 10             | 10.2           | 10.1        |
| Nitrites           | mg/L                |                                                   | 8.2            | 8.6            | 8.4         |
| Ammonium salt      | mg/L                |                                                   | 40             | 60             | 50          |
| Phosphates         | mg/L                |                                                   | 15             | 23             | 19          |
| Calcium            | mg/L                | 5.0                                               | 0.05           | 0.05           | 0.05        |
| Iron               | mg/L                | 200                                               | 0.05           | 0.05           | 0.05        |
| Zinc               | mg/L                | 2.0                                               | 0.05           | 0.05           | 0.05        |

BOD- biochemical oxygen demand

COD- organic chemical oxygen demand

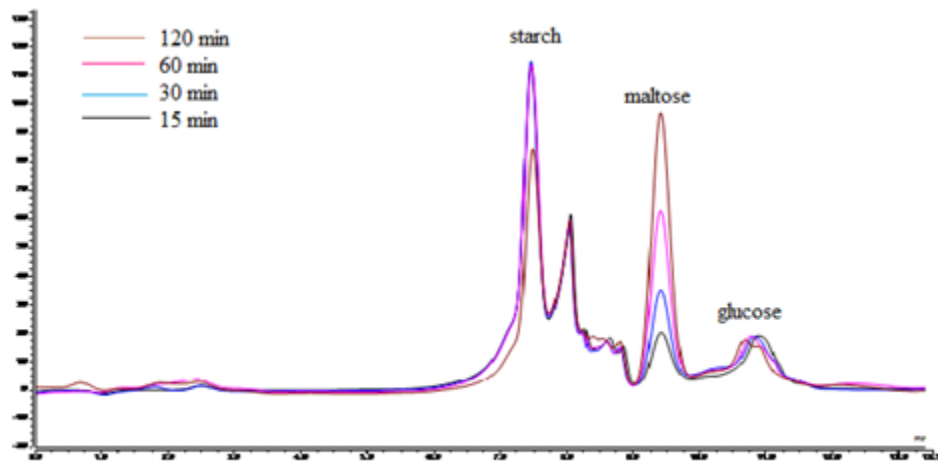

Figure 1. HPLC analysis of starch hydrolysis by *P. chitinolyticus* CKS1
